# Supplementary material
Source: HighWire-hosted journal article supplement (https://www.rcpjournals.org/highwire/filestream/9358/field_highwire_adjunct_files/0/Chan_Supplemental_file_S1_Letters.pdf)
Supplement: Chan_Supplemental_file_S1_Letters.pdf [file Chan_Supplemental_file_S1_Letters.pdf]

---

## Supplemental material S1 – Patient consent letter

### Re: Enbrel® switch to Benepali®

Dear [Patient Name] ,

We are sending you this letter because you are currently being treated with a medicine called 'Etanercept', which has the brand-name Enbrel®. We are contacting you as your Consultant has deemed it appropriate for you to switch to a different brand of Etanercept, a biosimilar product called Benepali®.

#### **Will this affect my care?**

Etanercept is known as a 'biological medicine'. Different brands of Etanercept are known as 'biosimilars' because they are biological medicines which are similar to the original product (in this case Enbrel®). Switching between biosimilar brands should not affect the safety or the effectiveness of your medicine.

#### **When will the switch happen?**

We are planning to switch eligible patients who have previously received Enbrel® to the biosimilar product, over the next 6 months. Your Consultant will be prescribing Benepali® instead of Enbrel® when they next prescribe your treatment. We will contact you over the telephone to notify you when the change will be taking place. The homecare provider will be Healthcare at Home and they will be arranging a nursing visit for you to be shown how to use the new device if required. The new device is similar to the Enbrel® device.

#### **Additional information**

Please see the enclosed biosimilar information sheet and Benepali® patient information leaflet.

If you have any unanswered questions or concerns after reading the enclosed we invite you to an educational session where there will be an opportunity to find out more and ask any questions you may have. If you like to attend please get in touch. These sessions will run from 6pm-7pm on the Medical Infusion Unit in the Royal Berkshire Hospital - dates will be advised.

If you would like to attend an educational session but are unable to do so then please contact the Rheumatology Clinical Advice Line on [Telephone Number] or the Pharmacy Homecare Team on [Telephone Number] for further advice.

Yours sincerely,
